# Supplementary material for: Synthesizing higher-capacity hard-carbons from cellulose for Na- and K-ion batteries
Source: Royal Society of Chemistry journal article supplement (doi:10.1039/c8ta05203d), 2018-01-01
Supplement: c8ta05203d1.pdf [file c8ta05203d1.pdf]

**Supplementary Information**  
**of**  
**“Synthesizing higher-capacity hard-carbons from  
cellulose for Na- and K-ion batteries”**

Hijiri Yamamoto,<sup>1</sup> Shotaro Muratsubaki,<sup>1</sup> Kei Kubota,<sup>1</sup> Mika Fukunishi,<sup>1</sup> Hiromu Watanabe,<sup>2</sup> Jungmin Kim,<sup>2</sup> and Shinichi Komaba<sup>1\*</sup>

<sup>1</sup> Department of Applied Chemistry, Tokyo University of Science, Shinjuku, Tokyo  
162-8601, Japan

<sup>2</sup> Mitsubishi Chemical Corporation, Yokohama, Kanagawa 227-8502, Japan

\*komaba@rs.kagu.tus.ac.jp

## Experimental details

Hard carbon was synthesized via two-step heat-treatment of pre-heating and carbonization steps. Precursors were prepared by pre-heating 5 grams white powder of reagent-grade glucose (Kanto Chemical Co., Inc.), maltose (Nacalai Tesque), cellulose derived from cotton linter (Sigma-Aldrich Inc.), glycogen (Nacalai Tesque), and amylopectin (MP Biomedicals, Inc.) at 180 °C for 12 h at a heating rate of 5 °C min<sup>-1</sup> with an electric muffle furnace (F-120-SP, Toyo Glass Machinery Co., Ltd.). Precursors derived from cellulose were prepared by heating cellulose powder in air at different temperatures of 180, 275, 300, and 350 °C for 12 h. The condition and apparatus for pre-heating are very important to have reproducible results of hard carbons, especially, for demonstrating high-capacity electrode materials.

The precursors were further carbonized with a tube furnace at 1300 °C for 1 h in Ar stream at a flow rate of 500 mL min<sup>-1</sup>. Before reaching to the targeted temperature, temperature was raised at heating rates of 5 °C min<sup>-1</sup> from room temperature to 250 °C, 1 °C min<sup>-1</sup> from 250 to 450 °C, and 5 °C min<sup>-1</sup> from 450 to 1300 °C [1]. In case of cellulose precursors, carbonization was carried at different temperatures of 700 - 1500 °C for 1 h at heating rates of 5 °C min<sup>-1</sup> from room temperature to 250 °C, 1 °C min<sup>-1</sup> from 250 to 450 °C, and 5 °C min<sup>-1</sup> from 450 °C to the targeted temperature in Ar at a flow rate of 500 mL min<sup>-1</sup>.

X-ray diffraction (XRD) patterns were collected by using Multiflex (Rigaku Co.) with Cu K $\alpha$  radiation at 40 kV and 30 mA at a scan rate of 2.0° min<sup>-1</sup>. Small angle X-ray scattering (SAXS) patterns were collected with UltimaIV and NANO-viewer (Rigaku Co.) with Cu K $\alpha$  at 40 kV and 40 mA, for which a borosilicate glass capillary and a planer holder were used, respectively. N<sub>2</sub> adsorption/desorption measurement was carried out at 77 K in BET method with BELSORP-mini II (MicrotracBEL Co.) to estimate specific surface area. Prior to the measurements, the samples were heated at 200 °C for 3 h under vacuum. Thermogravimetry (TG)-differential thermal analysis (DTA) was carried with DTG-60 (Shimadzu Co.) in air at 5 °C min<sup>-1</sup> heating.

For electrochemical test, hard carbon powder was mixed with sodium polyacrylate (Kishida Chemical) as a binder at a weight ratio of 95:5 with deionized water. The resulting slurry was uniformly pasted onto Cu for Li cell and Al foils for Na and K cells and dried at 80 °C in air and then at 150°C under vacuum. Hard carbon electrodes with acetylene black (Strem Chemicals) and sodium polyacrylate were prepared at a weight ratio of 85:10:5 only for rate-capability tests. R2032-type coin cells were assembled in an Ar-filled glove box. Lithium metal (Honjo Chemical), sodium metal (Kanto Chemical), and potassium metal (Sigma-Aldrich) were used as a counter electrode. Electrolyte solutions used were 1.0 mol dm<sup>-3</sup> LiPF<sub>6</sub> ethylene carbonate (EC):dimethyl carbonate (DMC) (1:1 v/v) (Kishida Chemical), 1.0 mol dm<sup>-3</sup> NaPF<sub>6</sub> propylene carbonate (PC) (Kishida Chemical), and 1.0 mol dm<sup>-3</sup> KN(SO<sub>2</sub>F)<sub>2</sub> (KFSA, Solvionic SA) EC:diethyl carbonate (DEC) (1:1 v/v) (Kishida Chemical) for Li, Na, and K cells, respectively. A glass fiber filter was used as a separator. Galvanostatic charge/discharge tests were performed in the voltage range of 0.002 - 2 V referring to Li, Na, or K electrodes at a current rate of 25 mA g<sup>-1</sup> at approximately 25°C. During the electroreduction process, constant voltage at 0.002 V for 8 h was applied after the galvanostatic reduction to minimize influence of polarization of the counter electrodes.

1) Xing, W.; Xue, J. S.; Dahn, J. R., *Journal of the Electrochemical Society* **1996**, 143 (10), 3046-3052.

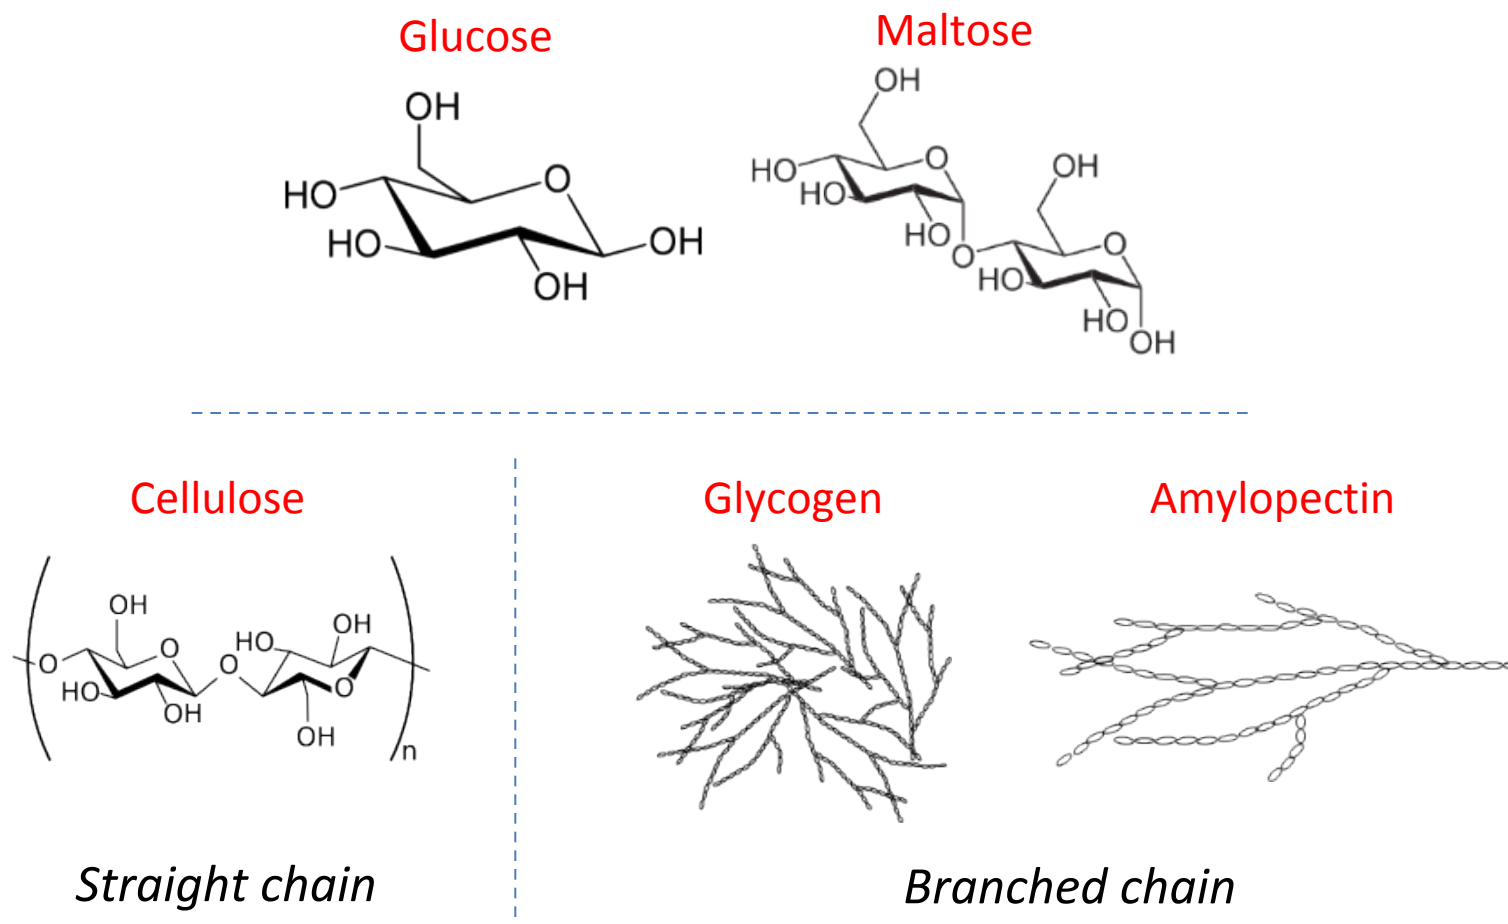

**Figure S1.** Molecular structures of raw saccharide materials used for HC synthesis.

|                 | Sample                                                                                                    | Mw                                     | Raw material                                                                          | Precursor                                                                             | Hard carbon                                                                           |
|-----------------|-----------------------------------------------------------------------------------------------------------|----------------------------------------|---------------------------------------------------------------------------------------|---------------------------------------------------------------------------------------|---------------------------------------------------------------------------------------|
| Mono-saccharide | <b>Glucose</b><br>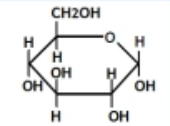       | 180.2                                  |    |    |    |
|                 | <b>Sucrose</b><br>       | 342.3                                  |    |    |    |
| Di-saccharide   | <b>Maltose</b><br>       | 342.3                                  |    |    |    |
|                 | <b>Cellulose</b><br>     | $1.0 \times 10^5 \sim 1.0 \times 10^6$ |    |    |    |
| Poly-saccharide | <b>Glycogen</b><br>     | $1.0 \times 10^6 \sim 1.0 \times 10^7$ |   |   |   |
|                 | <b>Amylopectin</b><br> | $1.5 \times 10^7 \sim 4.0 \times 10^7$ |  |  |  |

**Figure S2.** Photos of raw powders of saccharides used in this study, precursors formed at 180°C, and hard carbons prepared at 1300°C.

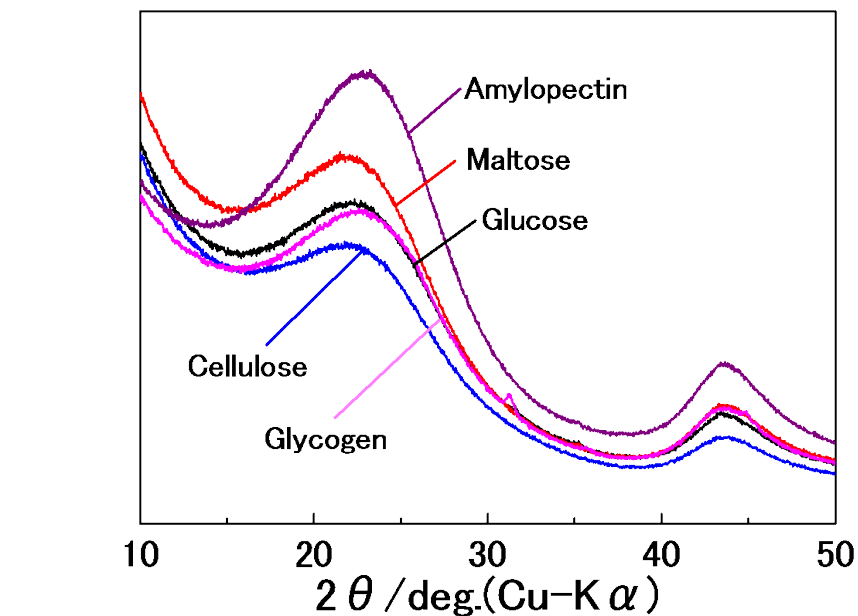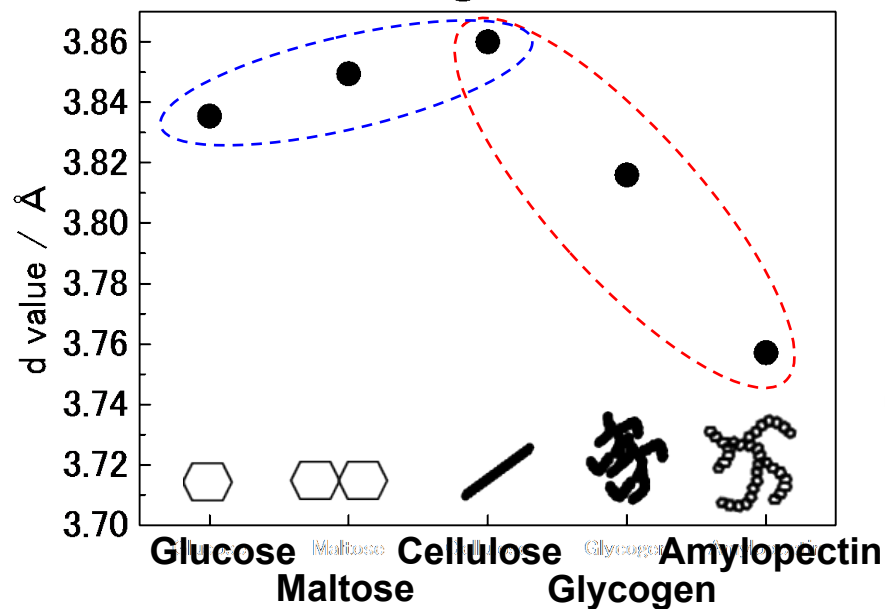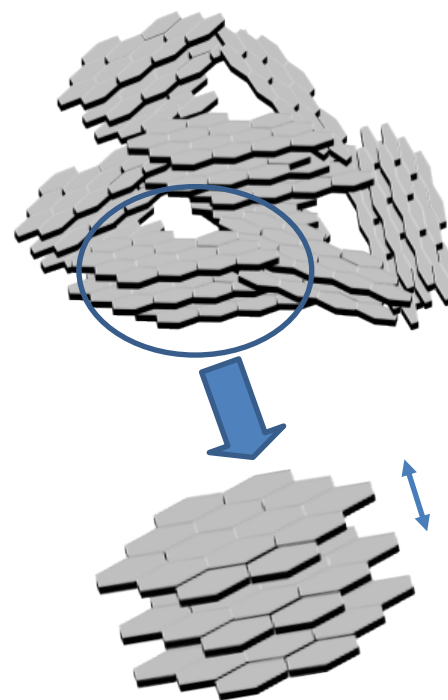

- Longer straight chain of poly saccharide  
→ *Larger interlayer distance*
- Many branches in the molecular  
→ *Shorter interlayer distance*

**Figure S3.** XRD patterns and d values of the Bragg 002 peak of hard carbons prepared from various saccharides through the same heat treatment procedure.

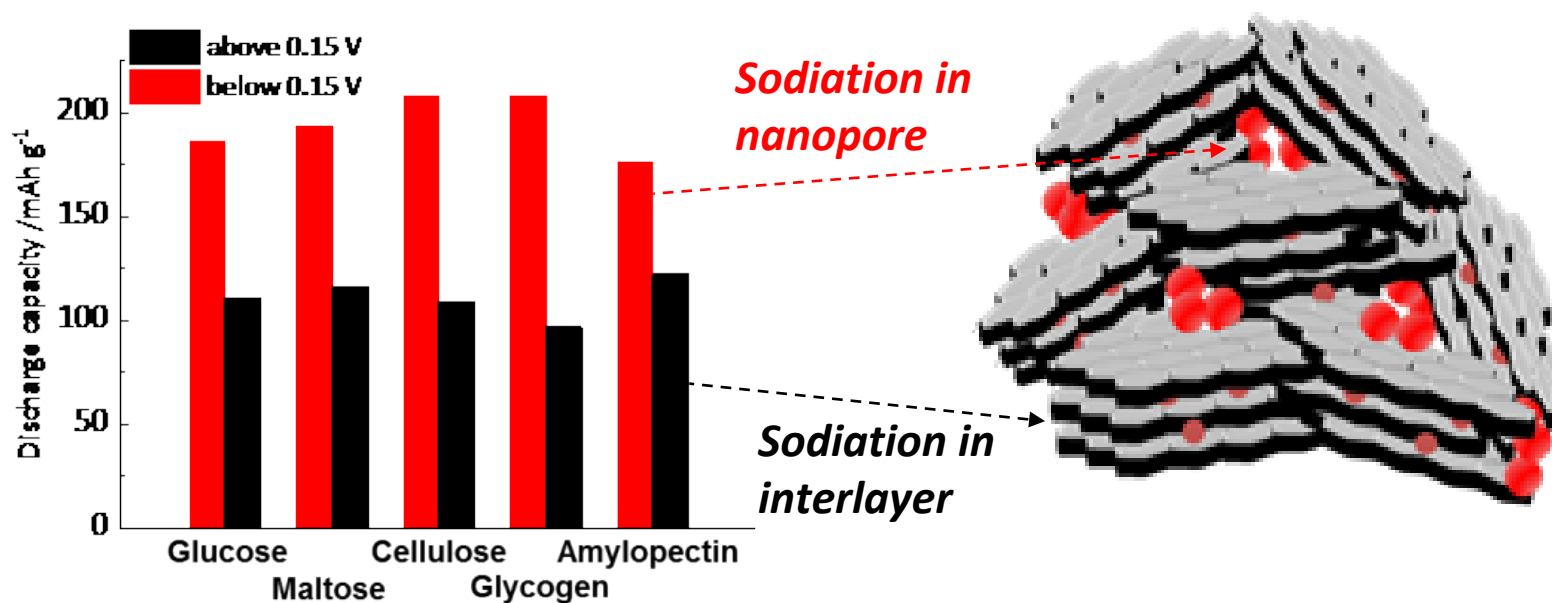

**Figure S4.** Reversible capacities divided at 0.15 V to find variation trends of the low-voltage plateau and high-voltage slope corresponding Na insertion into nanopore and interlayer, respectively, of hard carbons prepared from five saccharides.

*In air*

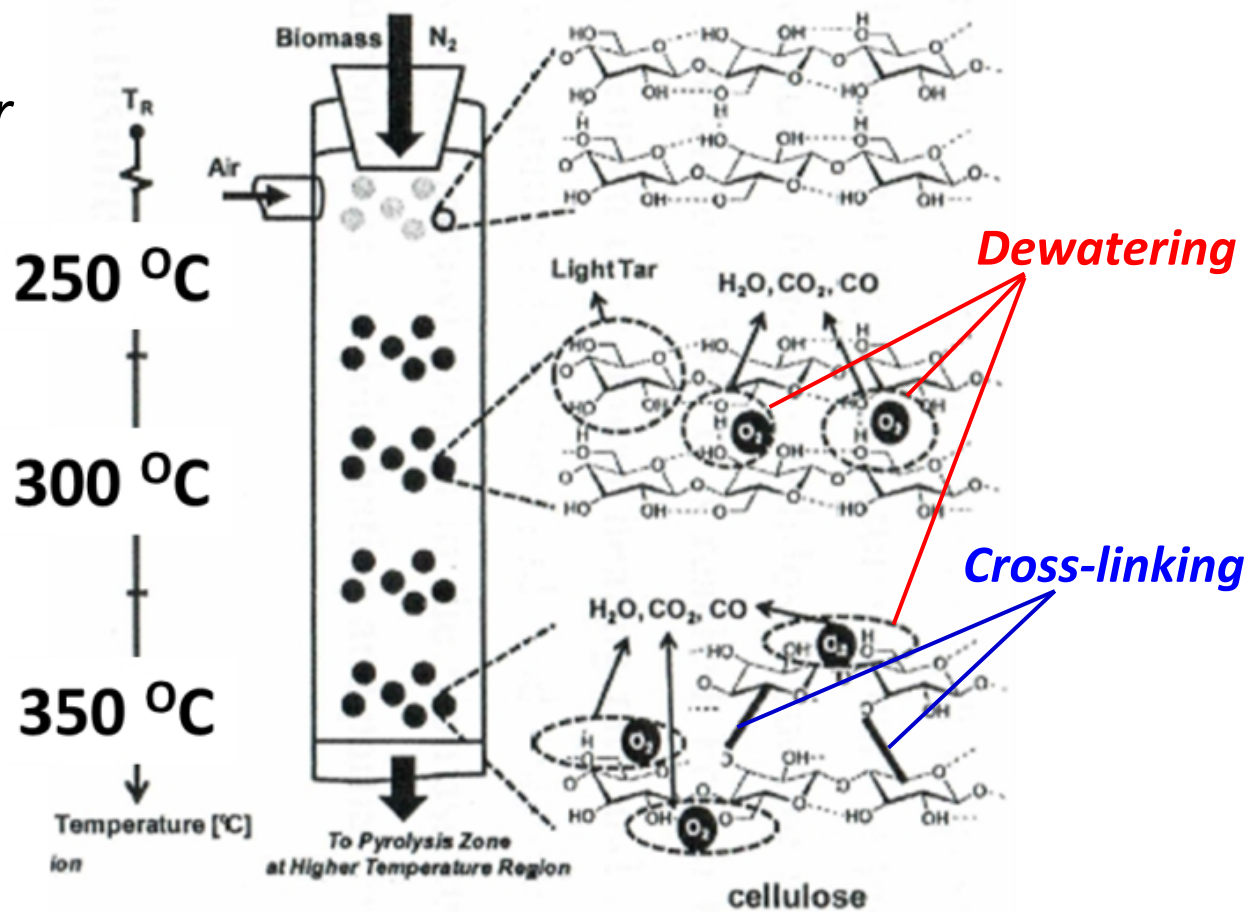

**Figure S5.** Thermal decomposition of cellulose, from a literature, W. Chariwat, Doctoral thesis, Kyoto University (2010). The decomposition of dewatering and crosslinking at temperature up to 350°C should affect the micro structure of hard carbon.

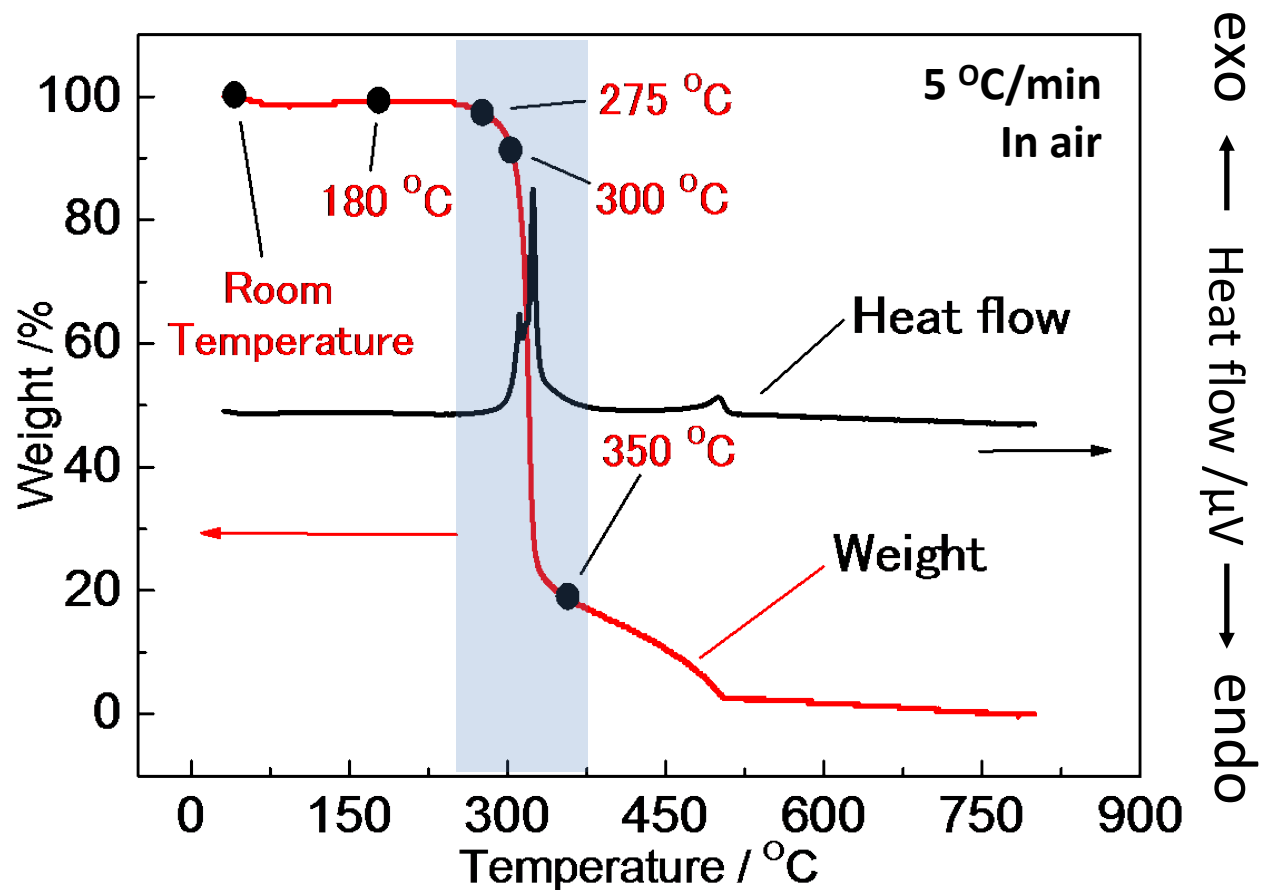

**Figure S6.** TG curve of cellulose powder measured in air. Large weight loss and exothermic peak were observed around 300 °C.



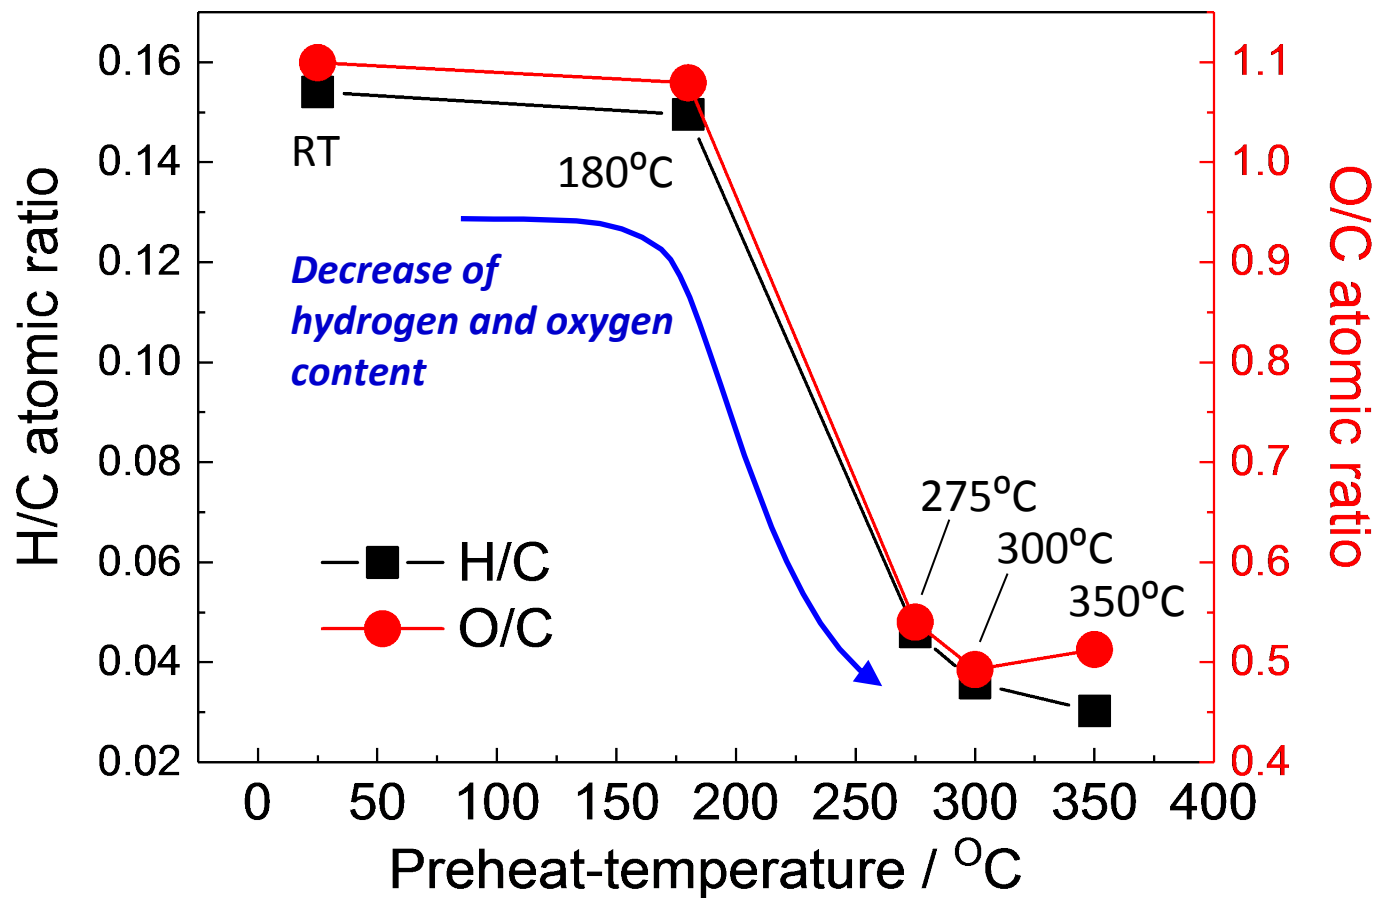

**Figure S7.** Elemental analysis results of H/C and O/C atomic ratio of hard carbon precursors of the preheat-treated cellulose . Heat-treatment in air results in decrease of oxygen and hydrogen content, which proved dewatering and cross-linkage in the precursors.

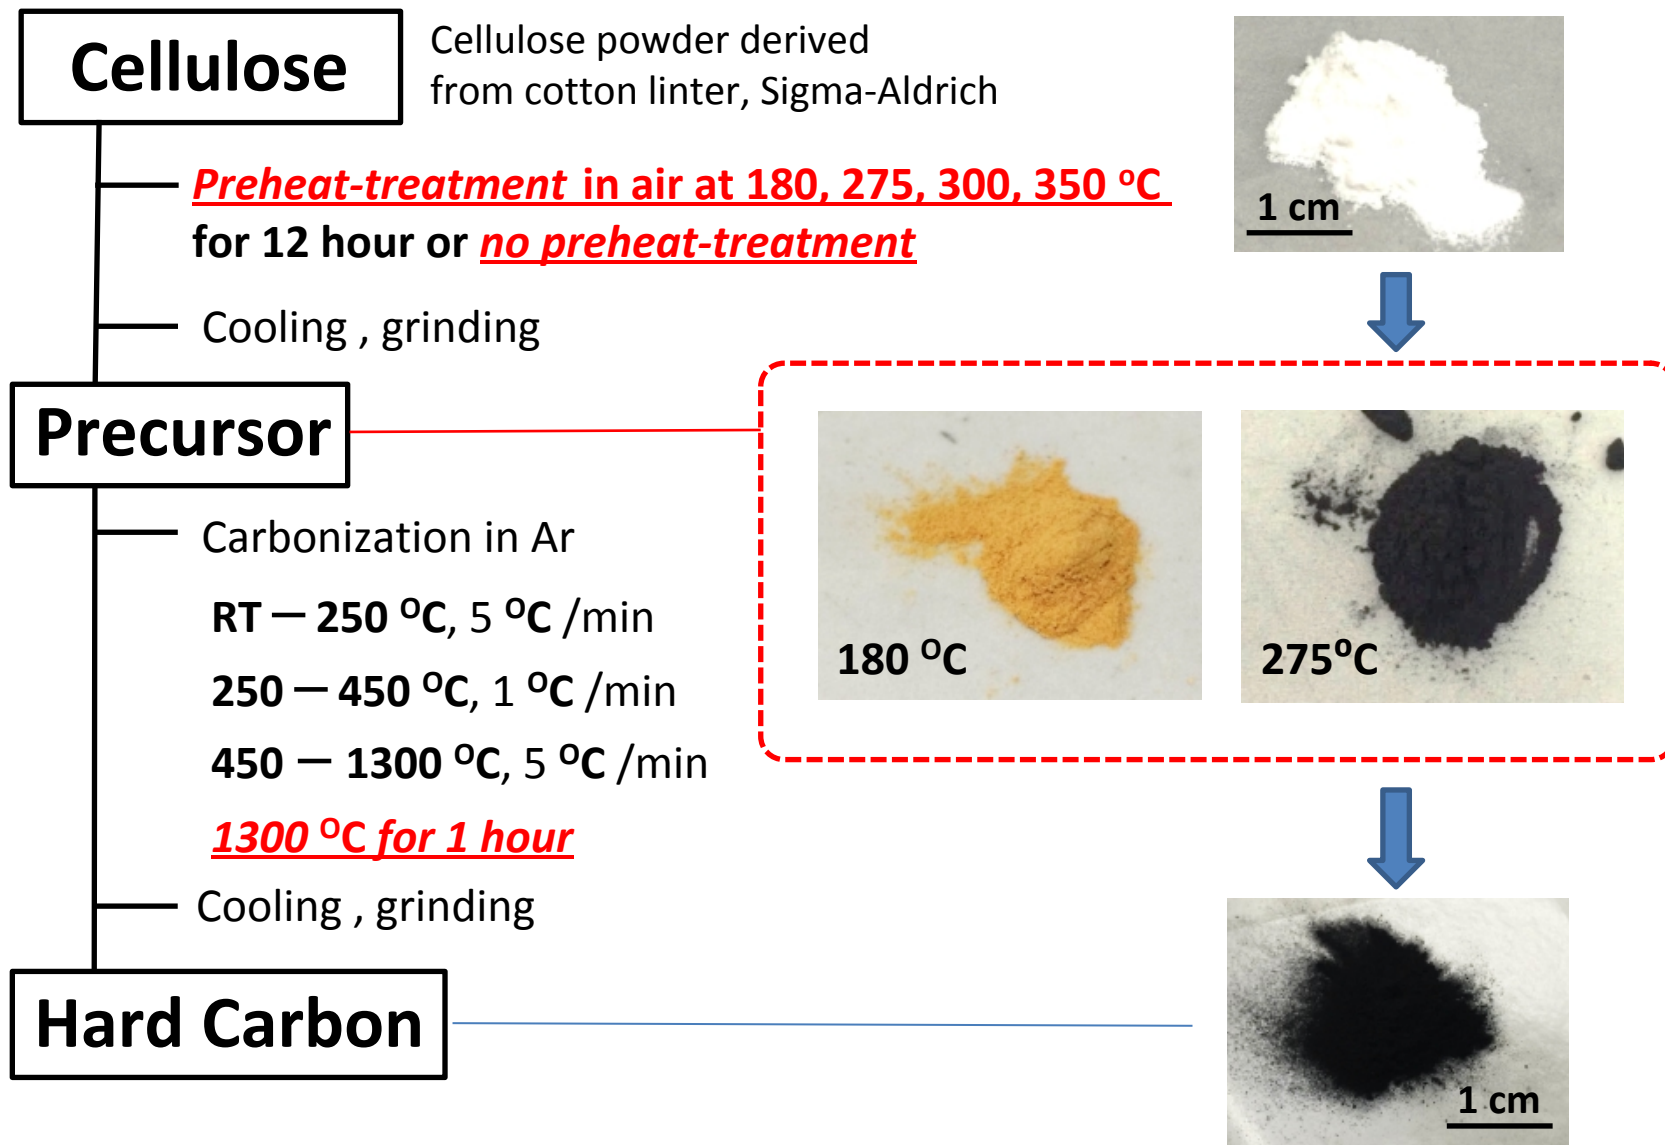

**Figure S8** Synthesis process of hard carbon from cellulose with photos of corresponding product powders.

No pre-heating

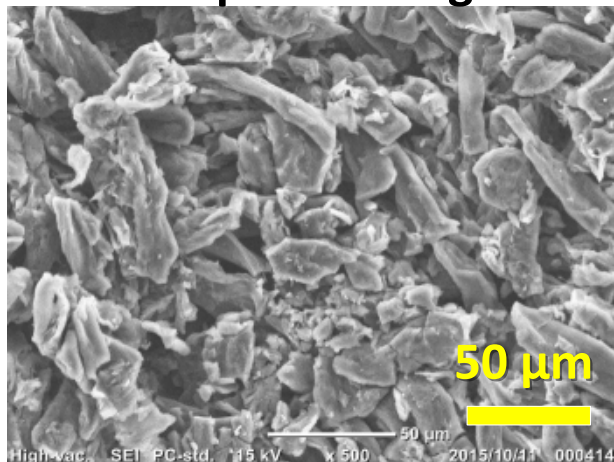

180 °C

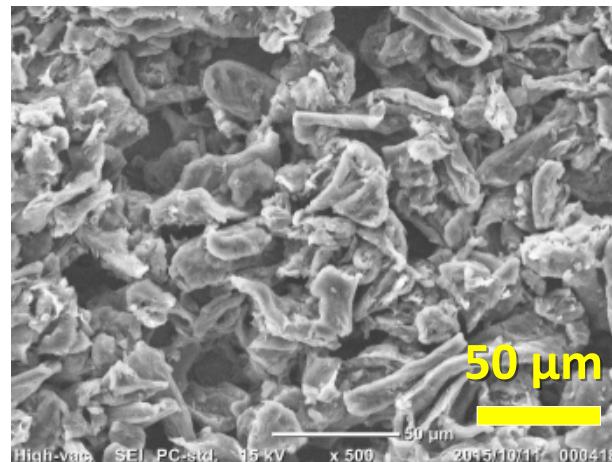

275 °C

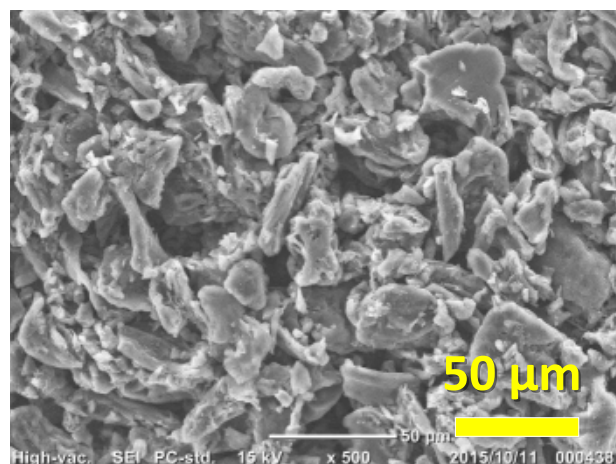

300 °C

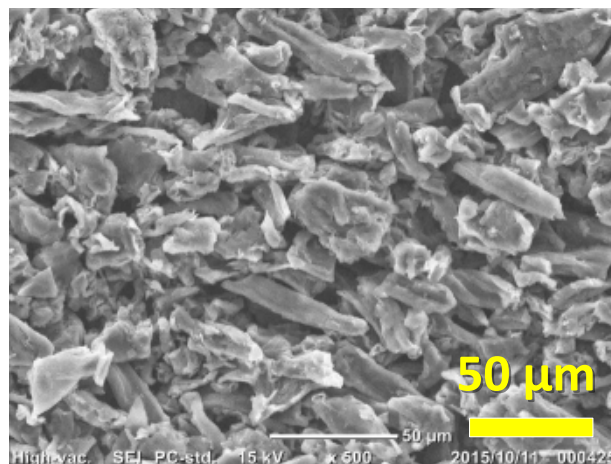

350 °C

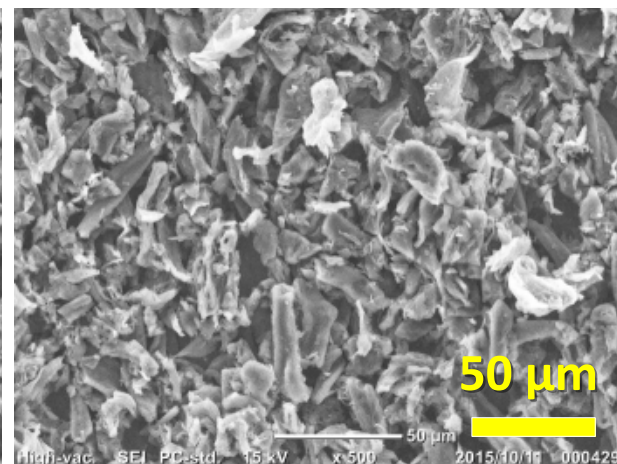

**Figure S9.** SEM images of hard carbons prepared by carbonization of precursors at 1300°C of different temperature of preheat-treatment.

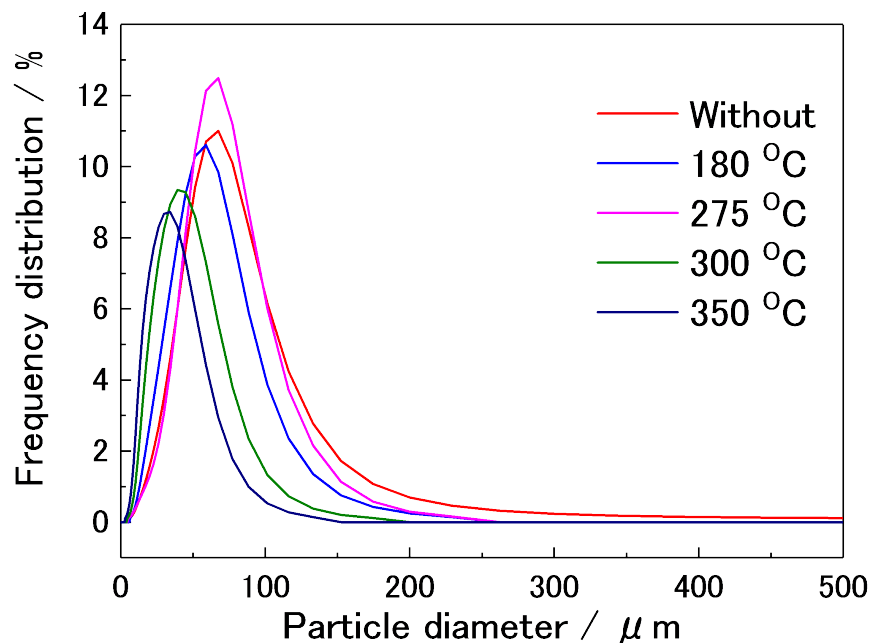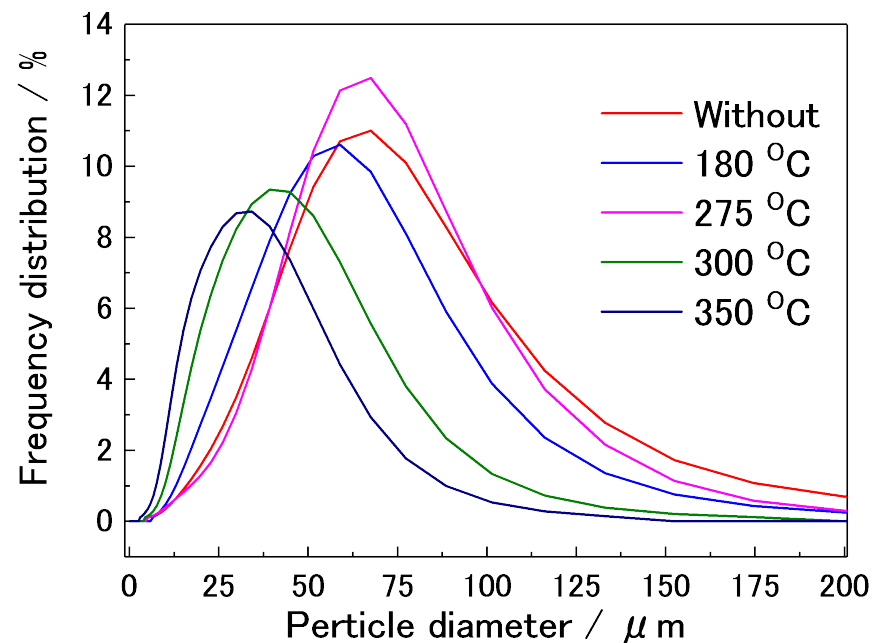

Treat at  $\sim 275^{\circ}\text{C} \rightarrow 50 \sim 70 \mu\text{m}$

Treat at  $300 \sim 350^{\circ}\text{C} \rightarrow 25 \sim 50 \mu\text{m}$

**Figure S10.** Particle size distribution of hard carbons prepared by carbonization of precursors at  $1300^{\circ}\text{C}$  of different temperature of preheat-treatment. The data shows the decrease in particle size with elevating the temperature of pretreatment.

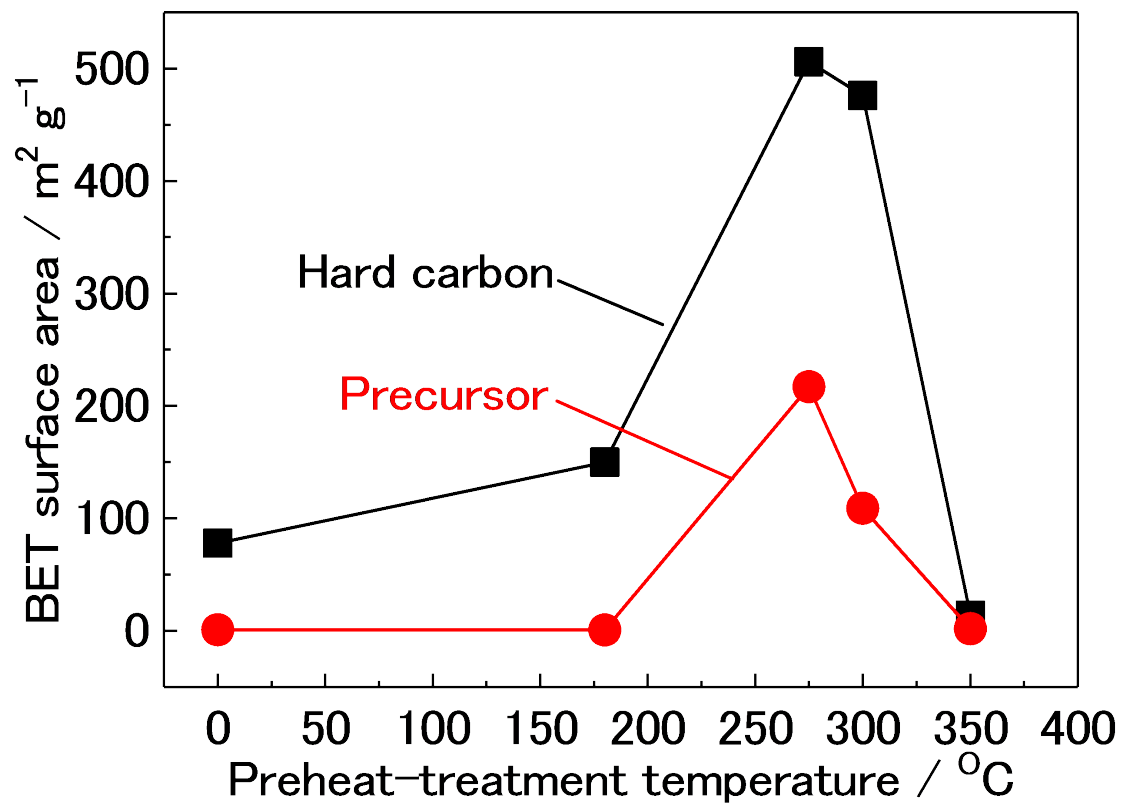

**Figure S11.** Variation of BET surface area of precursors and 1300 $^{\circ}\text{C}$ -carbonized HCs as a function of pretreatment temperature.

## A model used for SAXS analysis

$$I(q) = \rho^2 I_{0K} \left[ \frac{A}{q^n} + \frac{C_{mi}}{(1 + b^2 q^2)^2} \right]$$

$$R = \sqrt{10}b$$

$q$  : the wave vector

$A$  : proportional to the surface area of large mesopores

$n$  : the fitting constant ( $n=4$ )

$\rho^2$  : the squared electron density of graphite

$C_{mi}$  : proportional to the volume of micropores in the sample

$b$  : the Debye autocorrelation length of the micropores

**$R$  : radius of micropores**

Ref.) M.J. McDonald, J.R. Dahn *et al.*, *Carbon*, **68**, 452 (2014)

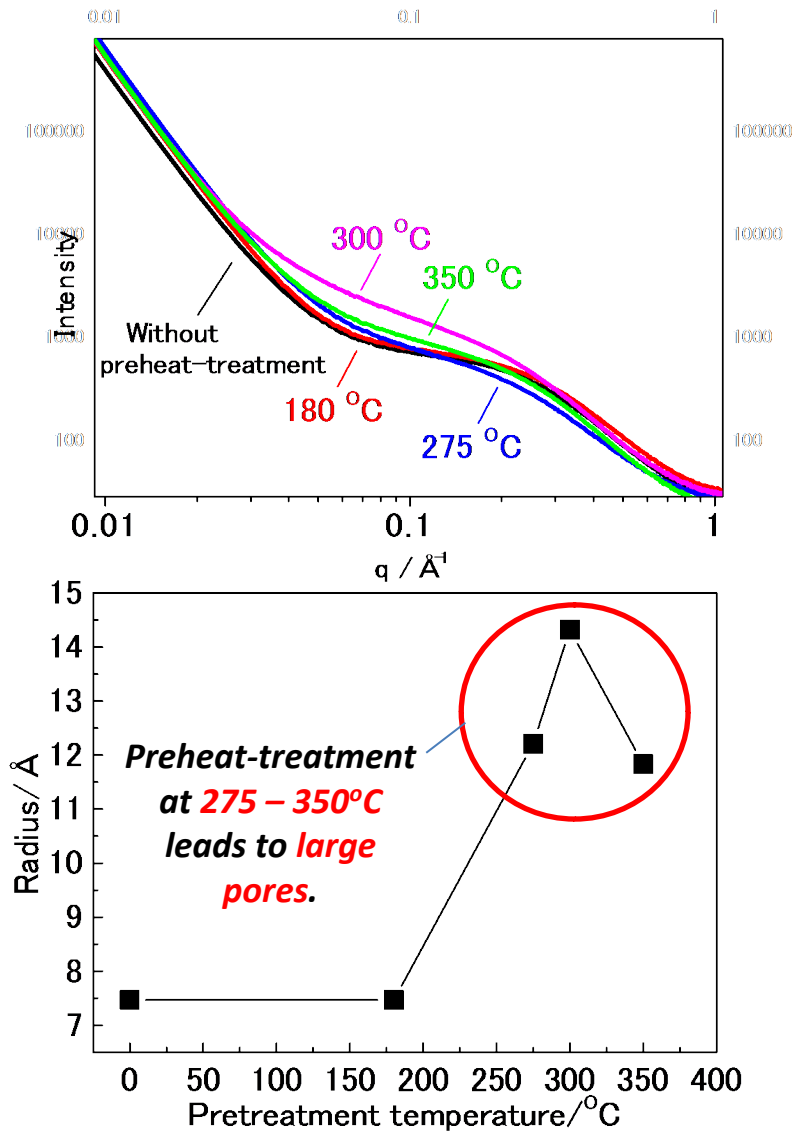

**Figure S12.** SAXS patterns and micropore's radii of hard carbons. A model used for pore size calculation is shown from the literature.

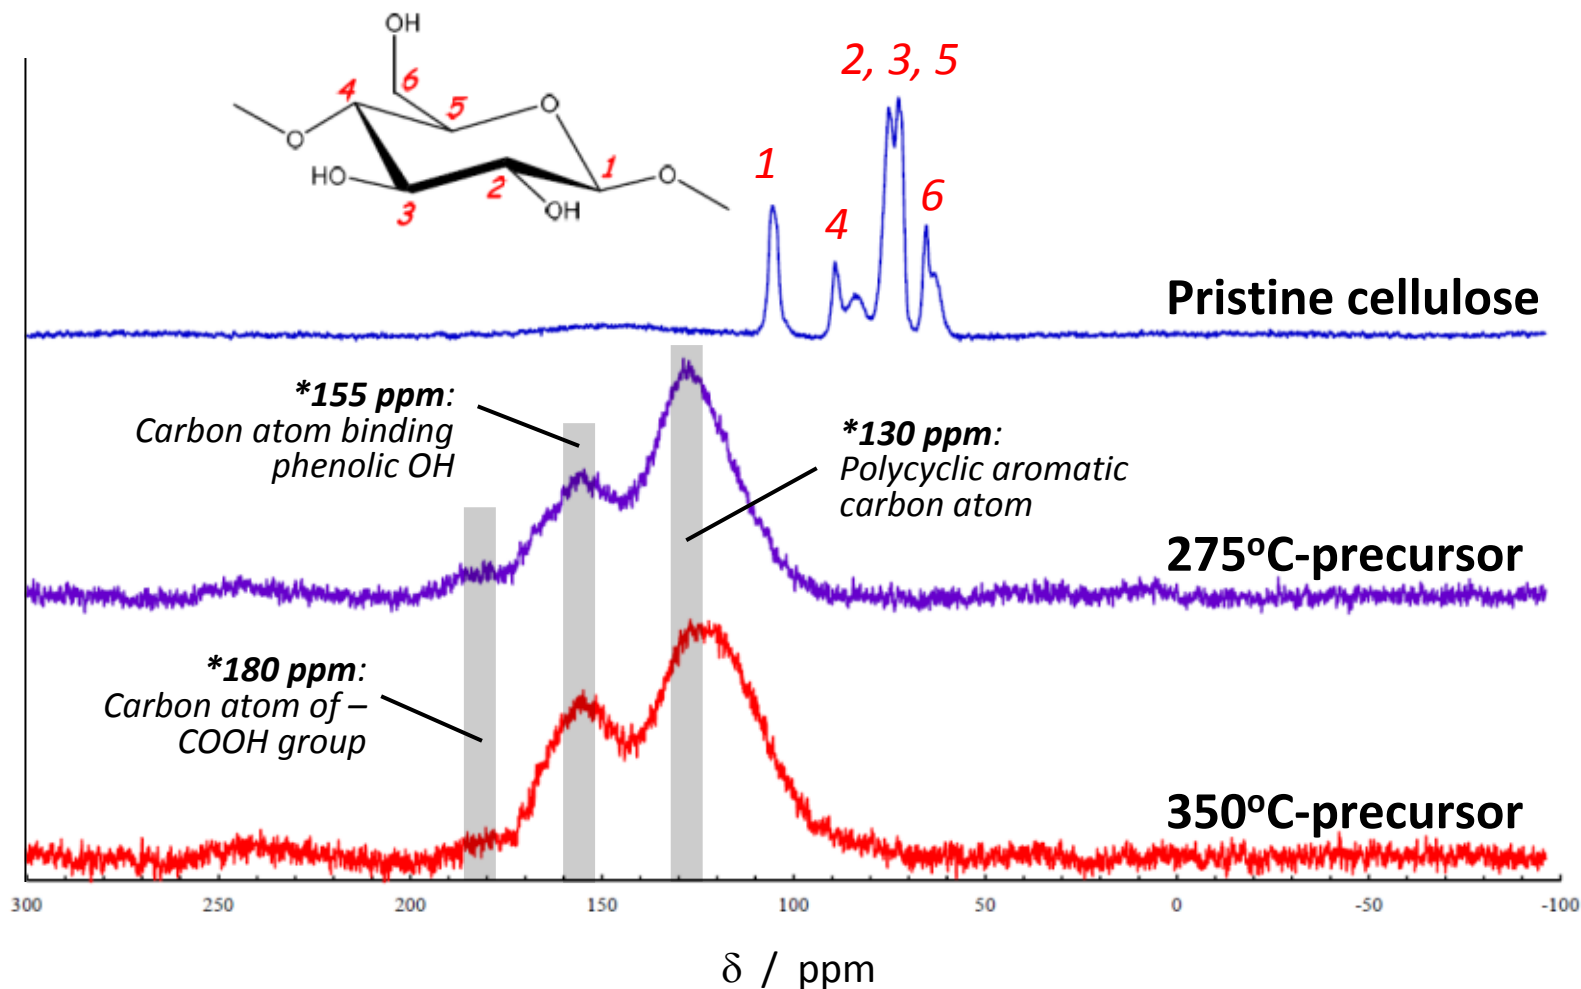

**Figure S13.** Solid-state  $^{13}\text{C}$  cross-polarization (CP) magic angle spinning (MAS) nuclear magnetic resonance (NMR) (CP/MAS NMR) spectra for pristine and heat-treated cellulose precursors at 275 and 350 . Contact time 2 ms.

\*Ref.) S. Suganuma et al., *J. Am. Chem. Soc.* **2008**, *130*, 12787-12793 and related references therein.

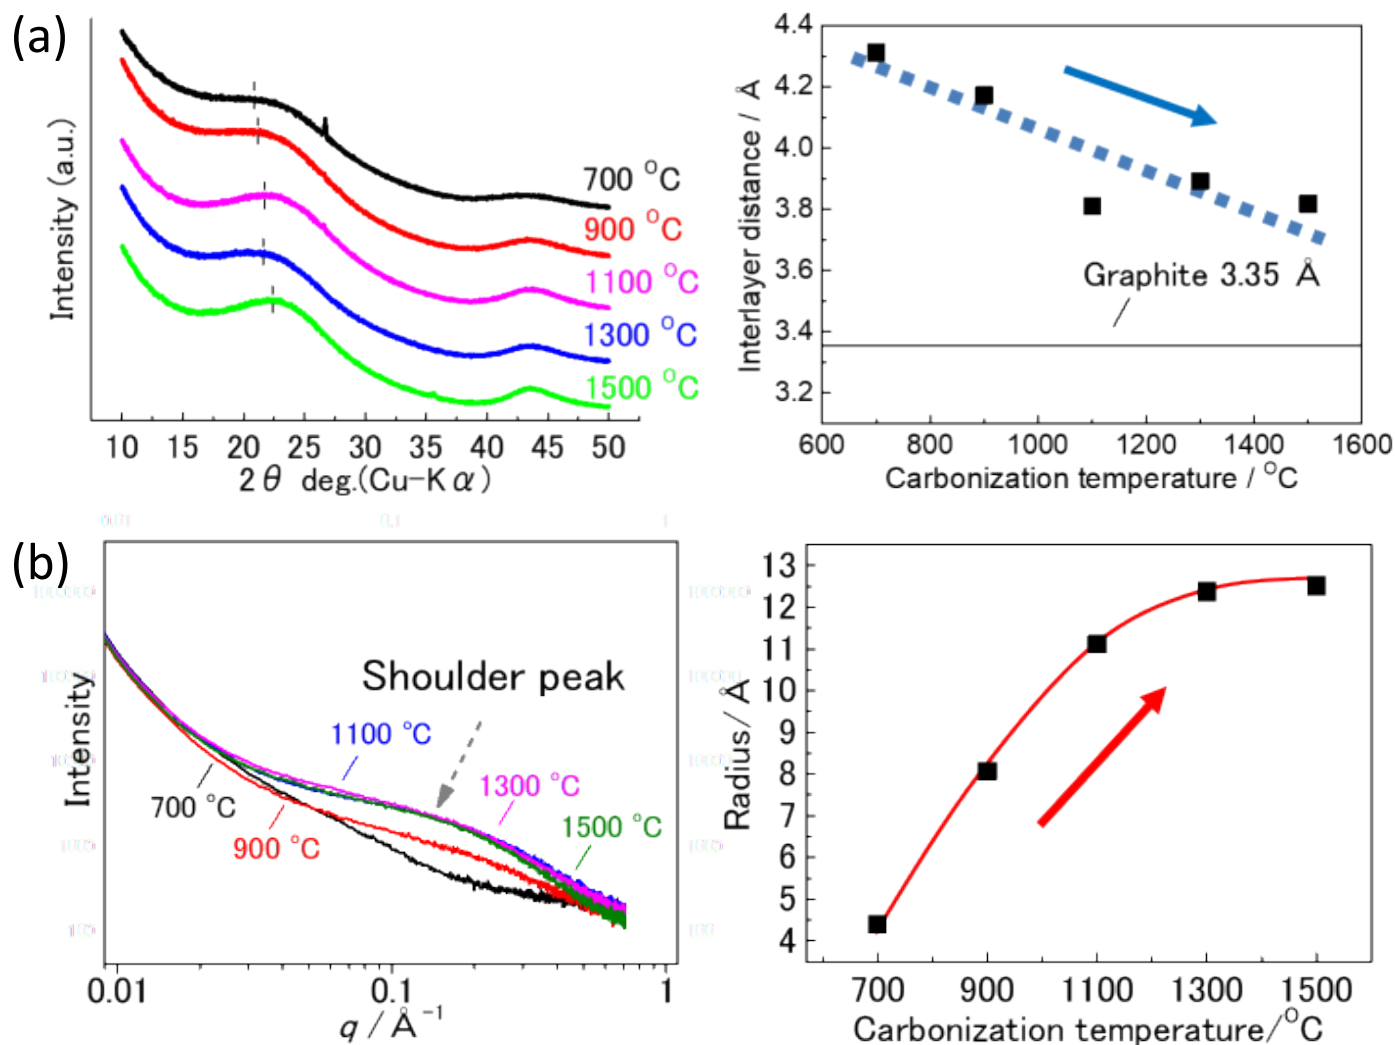

**Figure S14.** (a) XRD and (b) SAXS results of hard carbons prepared from precursors prepared at 275 °C by carbonization at different temperature.



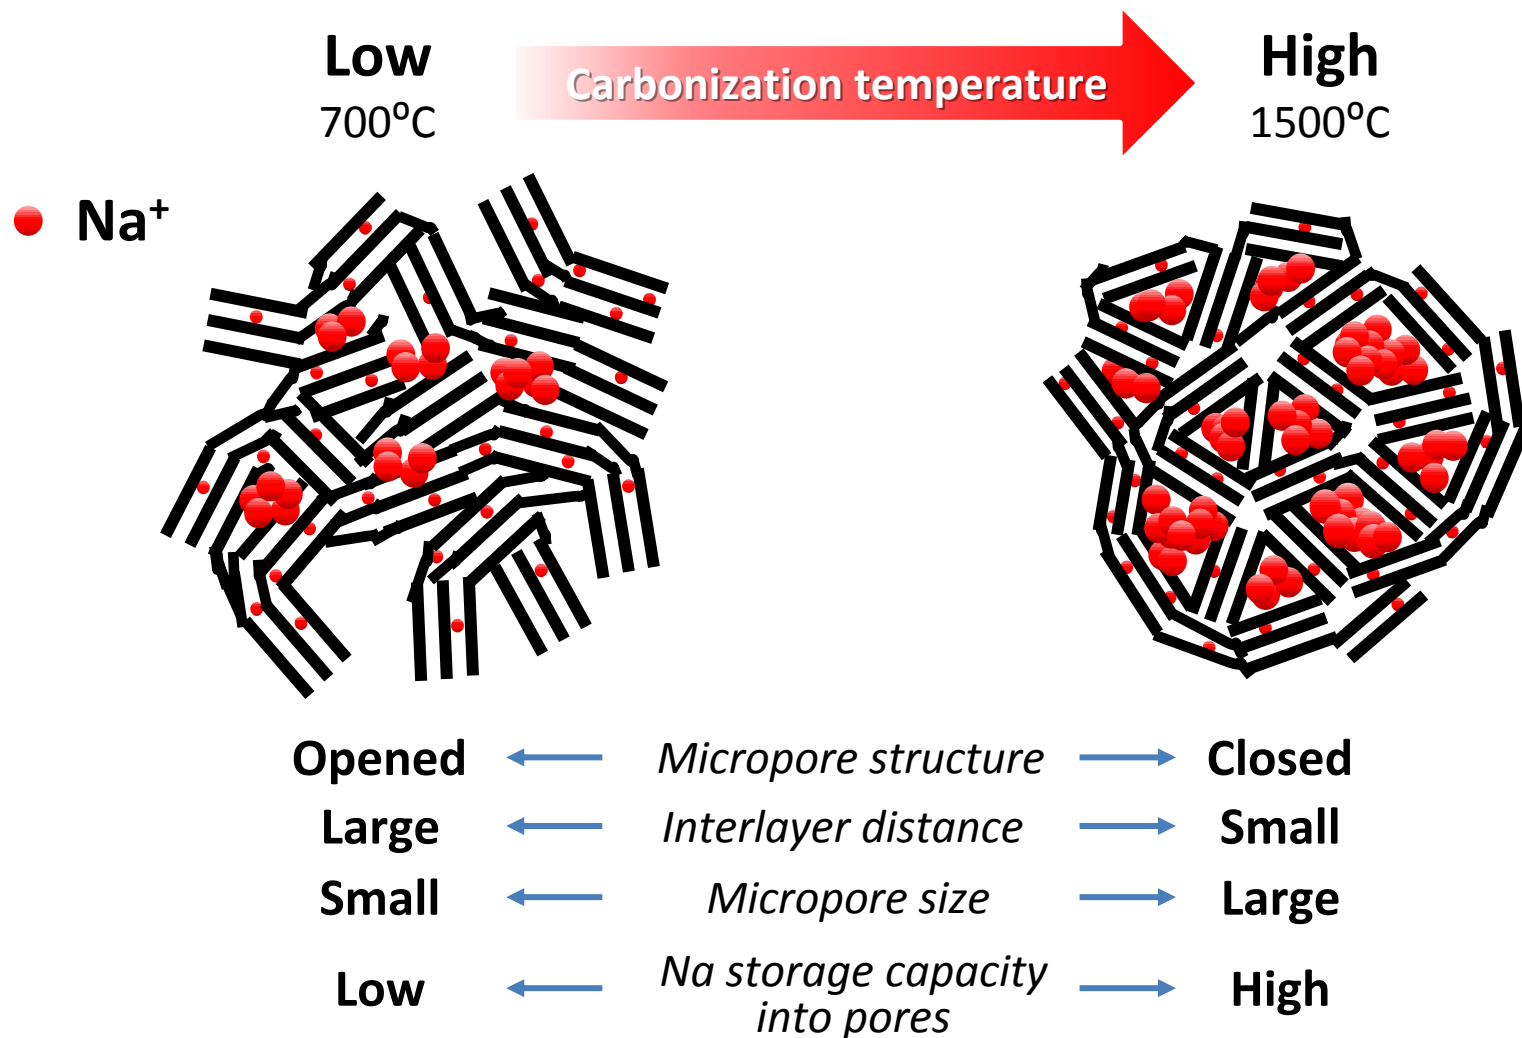

**Figure S15.** Scheme of dependence of hard-carbon properties on carbonization temperature showing that reversible capacity of hard carbon sodium cell gradually increased with the raising carbonization temperature from 700 to 1500°C which correlates with structural evolution.

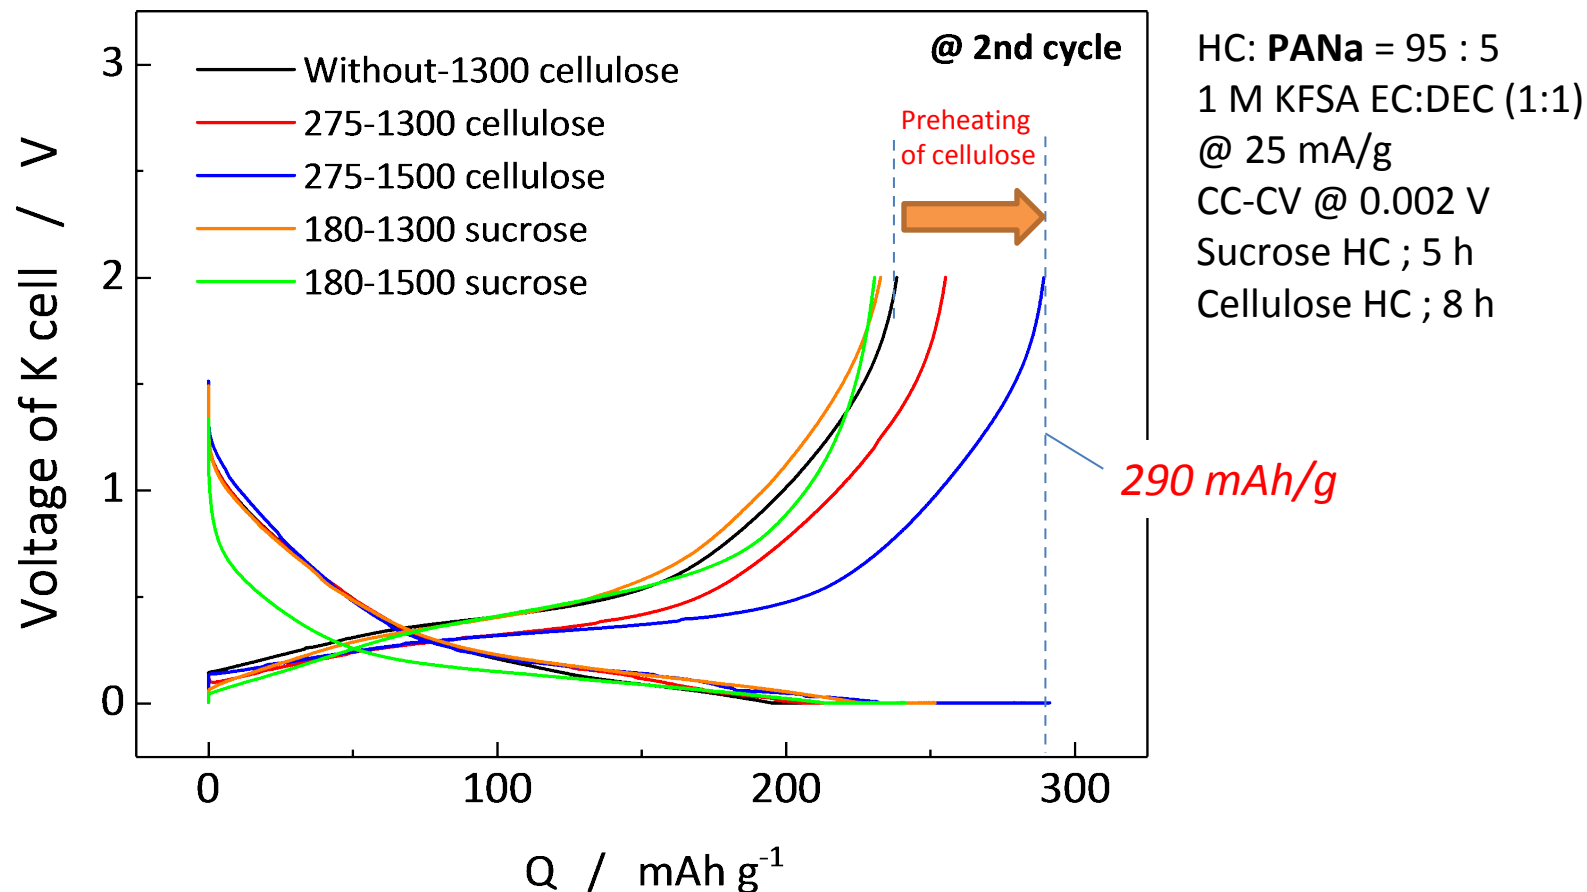

**Figure S16.** Second potassiation and depotassiation curves of hard carbons prepared through 274°C- and 180°C-pretreatment of cellulose and sucrose, respectively, followed by 1300°C- or 1500°C-carbonization. Cellulose- and sucrose-derived hard carbons are tested at a current rate of 25 mA g<sup>-1</sup> under CC-CV potassiation by applying 0.002 V for 8 and 5 h, respectively.

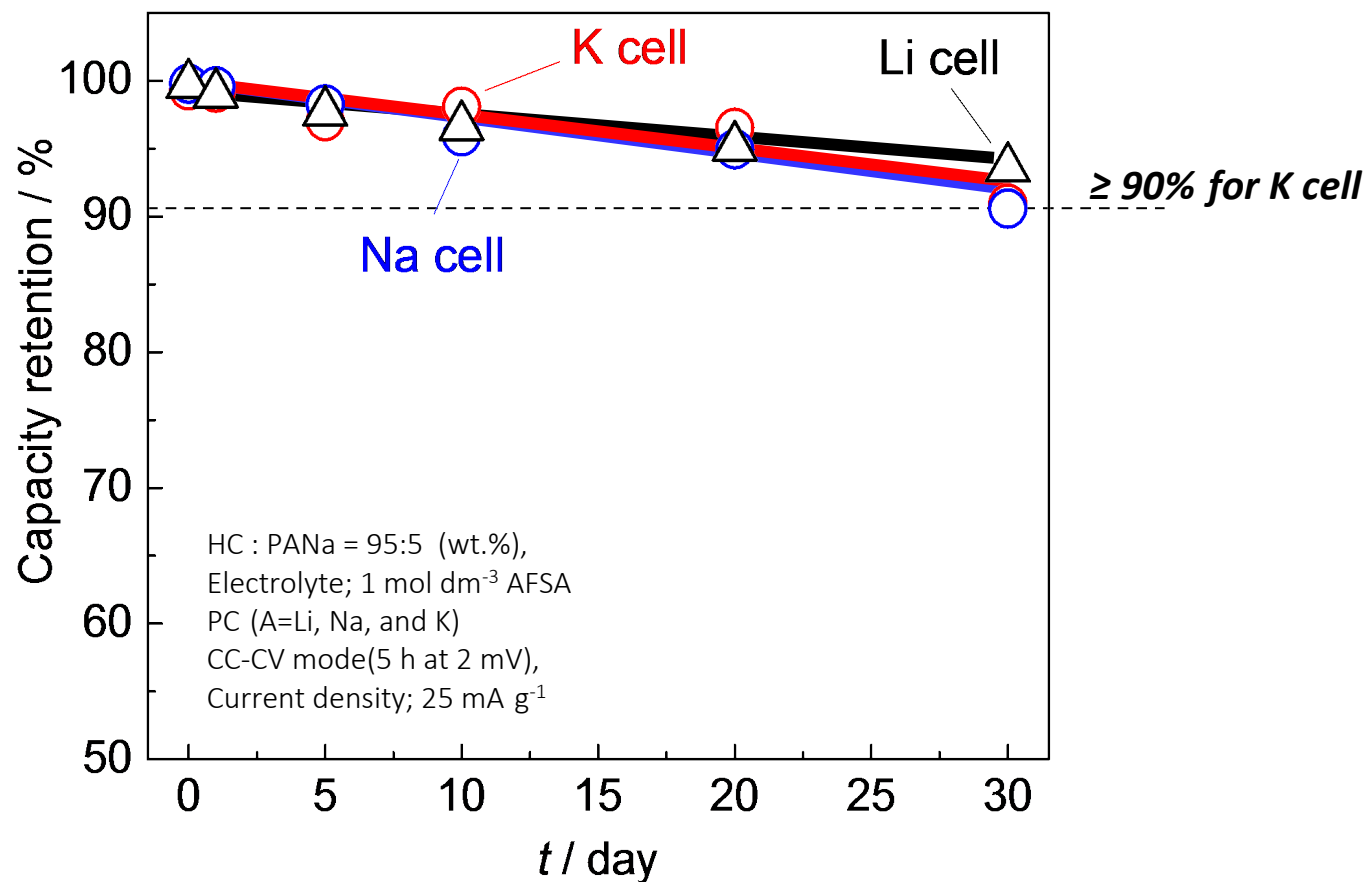

**Figure S17.** Capacity retention during storage of the hard-carbon electrodes after full insertion of potassium, sodium, and lithium at the tenth cycle, showing the self-discharge of negative electrode of K-ion battery will be comparable to the Li and Na cases.
